# Supplementary material for: Bacterial Morphotypes as Important Trait for Uropathogenic E. coli Diagnostic; a Virulence-Phenotype-Phylogeny Study
Source: MDPI journal article supplement (doi:10.3390/microorganisms9112381), 2021-11-18
Supplement: s1 [file s1]

**Supplementary Table S2.** Antibiotic resistance distribution in obtained clinical isolates of UPEC

| Isolate | Amgs |    |     | Fqns |     | Sphs | Nts | Pncn | 2 <sup>nd</sup> Cps |     | 3 <sup>rd</sup> Cps |     |     | 4 <sup>th</sup> Cps | Mnbn | β-lactams + Inh |     | Ttyn | Cpnm |     |     | Classification |
|---------|------|----|-----|------|-----|------|-----|------|---------------------|-----|---------------------|-----|-----|---------------------|------|-----------------|-----|------|------|-----|-----|----------------|
|         | AMK  | GM | CIP | NOR  | LVX | TSX  | MAC | AMP  | CX                  | CFX | CFZ                 | CTX | CRO | FEP                 | ATM  | AMC             | AMS | TE   | MEM  | IMP | ETP |                |
| 1       | 1    | 1  | 1   | 1    | 1   | 0    | 0   | 1    | 0                   | 1   | 0                   | 1   | 0   | 0                   | 0    | 1               | 1   | 0    | 0    | 0   | 0   | MDR            |
| 2       | 0    | 1  | 1   | 1    | 1   | 1    | 0   | 1    | 0                   | 1   | 1                   | 1   | 1   | 1                   | 1    | 1               | 1   | 1    | 0    | 0   | 0   | XDR            |
| 3       | 1    | 1  | 0   | 0    | 0   | 1    | 0   | 1    | 0                   | 1   | 0                   | 1   | 1   | 0                   | 0    | 1               | 1   | 1    | 0    | 0   | 0   | MDR            |
| 4       | 1    | 1  | 0   | 0    | 0   | 0    | 0   | 0    | 0                   | 1   | 0                   | 0   | 0   | 0                   | 0    | 0               | 0   | 0    | 0    | 0   | 0   | NMDR           |
| 5       | 0    | 0  | 0   | 0    | 0   | 1    | 0   | 1    | 1                   | 1   | 1                   | 1   | 1   | 1                   | 1    | 1               | 1   | 0    | 0    | 0   | 0   | MDR            |
| 6       | 0    | 1  | 1   | 1    | 1   | 1    | 0   | 1    | 0                   | 1   | 0                   | 0   | 0   | 0                   | 0    | 1               | 0   | 1    | 0    | 0   | 0   | MDR            |
| 7       | 1    | 1  | 0   | 0    | 0   | 0    | 0   | 1    | 0                   | 1   | 0                   | 0   | 0   | 0                   | 0    | 1               | 0   | 1    | 1    | 0   | 0   | MDR            |
| 8       | 0    | 0  | 0   | 0    | 0   | 0    | 0   | 0    | 0                   | 1   | 0                   | 0   | 0   | 0                   | 0    | 0               | 0   | 1    | 0    | 0   | 0   | NMDR           |
| 9       | 0    | 0  | 0   | 0    | 0   | 0    | 0   | 0    | 0                   | 0   | 0                   | 0   | 0   | 0                   | 0    | 0               | 0   | 0    | 0    | 0   | 0   | NMDR           |
| 10      | 0    | 1  | 0   | 0    | 0   | 0    | 0   | 1    | 0                   | 1   | 1                   | 1   | 0   | 0                   | 1    | 0               | 0   | 1    | 0    | 0   | 0   | MDR            |
| 11      | 0    | 1  | 1   | 1    | 1   | 0    | 0   | 1    | 0                   | 1   | 0                   | 1   | 0   | 0                   | 0    | 1               | 0   | 0    | 0    | 0   | 0   | MDR            |
| 12      | 1    | 1  | 0   | 0    | 0   | 0    | 0   | 1    | 0                   | 1   | 0                   | 1   | 0   | 0                   | 1    | 1               | 1   | 1    | 0    | 0   | 0   | MDR            |
| 13      | 0    | 0  | 0   | 0    | 0   | 0    | 0   | 0    | 0                   | 1   | 0                   | 1   | 0   | 0                   | 0    | 0               | 0   | 0    | 0    | 0   | 0   | MDR            |
| 14      | 1    | 0  | 1   | 0    | 0   | 0    | 0   | 0    | 0                   | 1   | 0                   | 1   | 1   | 0                   | 0    | 0               | 0   | 1    | 0    | 0   | 0   | MDR            |
| 15      | 0    | 1  | 0   | 0    | 0   | 1    | 0   | 1    | 0                   | 1   | 0                   | 1   | 0   | 0                   | 0    | 1               | 0   | 1    | 0    | 0   | 0   | MDR            |
| 16      | 0    | 1  | 0   | 0    | 0   | 0    | 0   | 0    | 0                   | 1   | 0                   | 1   | 0   | 0                   | 0    | 1               | 0   | 0    | 0    | 0   | 0   | MDR            |
| 17      | 1    | 1  | 0   | 0    | 0   | 0    | 0   | 0    | 0                   | 1   | 0                   | 1   | 0   | 0                   | 0    | 0               | 0   | 1    | 0    | 0   | 0   | MDR            |
| 18      | 0    | 0  | 0   | 0    | 0   | 0    | 0   | 1    | 0                   | 1   | 0                   | 1   | 0   | 0                   | 0    | 1               | 1   | 0    | 0    | 0   | 0   | MDR            |
| 19      | 1    | 0  | 0   | 0    | 0   | 0    | 0   | 0    | 0                   | 1   | 0                   | 1   | 0   | 0                   | 0    | 1               | 0   | 0    | 0    | 0   | 0   | MDR            |
| 20      | 1    | 1  | 0   | 0    | 0   | 0    | 0   | 1    | 0                   | 1   | 0                   | 1   | 1   | 0                   | 1    | 1               | 0   | 0    | 0    | 0   | 0   | MDR            |
| 21      | 1    | 0  | 0   | 0    | 0   | 1    | 0   | 1    | 0                   | 1   | 1                   | 1   | 1   | 0                   | 0    | 1               | 1   | 0    | 0    | 0   | 0   | MDR            |
| 22      | 1    | 1  | 0   | 0    | 0   | 0    | 0   | 1    | 0                   | 1   | 1                   | 1   | 0   | 0                   | 0    | 0               | 0   | 0    | 0    | 0   | 0   | MDR            |
| 23      | 1    | 1  | 0   | 0    | 0   | 0    | 0   | 1    | 0                   | 1   | 0                   | 1   | 1   | 0                   | 0    | 1               | 0   | 0    | 0    | 0   | 0   | MDR            |
| 24      | 1    | 1  | 0   | 0    | 0   | 0    | 0   | 1    | 1                   | 1   | 1                   | 1   | 1   | 0                   | 0    | 1               | 0   | 0    | 0    | 0   | 0   | MDR            |
| 25      | 1    | 1  | 0   | 0    | 0   | 1    | 0   | 1    | 0                   | 1   | 0                   | 1   | 1   | 0                   | 0    | 1               | 0   | 1    | 0    | 0   | 0   | MDR            |
| 26      | 1    | 1  | 0   | 0    | 0   | 0    | 0   | 1    | 0                   | 1   | 0                   | 1   | 0   | 0                   | 0    | 1               | 1   | 0    | 0    | 0   | 0   | MDR            |
| 27      | 1    | 1  | 1   | 1    | 1   | 1    | 0   | 1    | 1                   | 1   | 1                   | 1   | 1   | 0                   | 1    | 1               | 0   | 0    | 1    | 0   | 0   | XDR            |
| 28      | 1    | 1  | 0   | 0    | 0   | 1    | 0   | 1    | 0                   | 1   | 1                   | 1   | 1   | 0                   | 0    | 1               | 1   | 1    | 0    | 0   | 0   | MDR            |
| 29      | 1    | 1  | 1   | 1    | 1   | 1    | 0   | 1    | 0                   | 1   | 1                   | 1   | 1   | 0                   | 1    | 1               | 0   | 1    | 0    | 0   | 0   | MDR            |
| 30      | 0    | 0  | 0   | 0    | 0   | 1    | 0   | 1    | 0                   | 1   | 1                   | 1   | 0   | 0                   | 0    | 1               | 1   | 1    | 0    | 0   | 0   | MDR            |
| 31      | 0    | 1  | 1   | 1    | 1   | 1    | 0   | 1    | 1                   | 1   | 1                   | 1   | 1   | 0                   | 0    | 1               | 0   | 0    | 0    | 0   | 0   | MDR            |
| 32      | 1    | 1  | 1   | 1    | 1   | 1    | 0   | 1    | 0                   | 1   | 1                   | 1   | 1   | 0                   | 0    | 1               | 1   | 0    | 0    | 0   | 0   | MDR            |
| 33      | 1    | 1  | 0   | 0    | 0   | 1    | 0   | 1    | 0                   | 1   | 0                   | 1   | 1   | 0                   | 1    | 1               | 1   | 0    | 0    | 0   | 0   | MDR            |

|    |   |   |   |   |   |   |   |   |   |   |   |   |   |   |   |   |   |   |   |   |   |     |
|----|---|---|---|---|---|---|---|---|---|---|---|---|---|---|---|---|---|---|---|---|---|-----|
| 34 | 1 | 1 | 1 | 1 | 1 | 1 | 1 | 1 | 0 | 1 | 1 | 1 | 1 | 0 | 0 | 1 | 1 | 1 | 0 | 0 | 0 | MDR |
| 35 | 1 | 1 | 1 | 1 | 1 | 1 | 1 | 1 | 1 | 1 | 1 | 1 | 1 | 0 | 0 | 1 | 0 | 0 | 0 | 1 | 0 | XDR |
| 36 | 1 | 1 | 1 | 1 | 1 | 1 | 0 | 1 | 1 | 1 | 1 | 1 | 1 | 0 | 1 | 1 | 0 | 0 | 0 | 0 | 0 | MDR |
| 37 | 0 | 0 | 0 | 0 | 0 | 1 | 0 | 1 | 0 | 1 | 0 | 0 | 0 | 0 | 0 | 1 | 1 | 0 | 0 | 0 | 0 | MDR |
| 38 | 0 | 1 | 0 | 0 | 1 | 1 | 0 | 1 | 0 | 1 | 0 | 0 | 0 | 1 | 1 | 1 | 1 | 0 | 0 | 0 | 0 | MDR |
| 39 | 1 | 1 | 1 | 1 | 0 | 0 | 0 | 1 | 0 | 1 | 1 | 1 | 1 | 0 | 0 | 1 | 1 | 1 | 0 | 1 | 0 | MDR |
| 40 | 0 | 0 | 1 | 1 | 1 | 0 | 0 | 1 | 0 | 1 | 1 | 1 | 1 | 1 | 1 | 1 | 1 | 1 | 0 | 1 | 0 | MDR |

**Amgs:** Aminoglycosides; **Fqns:** Fluoroquinolones; **Sphs:** Sulphas; **Nts:** Nitrofurans; **Pncn:** Penicillin; **2<sup>nd</sup> Cps:** 2<sup>nd</sup> Generations Cephalosporins; **3<sup>rd</sup> Cps:** 3<sup>rd</sup> Generations Cephalosporins; **4<sup>th</sup> Cps:** 4<sup>th</sup> Generation Cephalosporins; **Mnbm:** Monobactams; **β-lactams + Inh:** β-lactams + Inhibitors; **tyn:** Tetracyclin; **Cpnm:** Carbapenems. **1:** Resistant phenotype; **0:** Susceptible phenotype
