# Supplementary material for: Bacterial Morphotypes as Important Trait for Uropathogenic E. coli Diagnostic; a Virulence-Phenotype-Phylogeny Study
Source: MDPI journal article supplement (doi:10.3390/microorganisms9112381), 2021-11-18
Supplement: s1 [file s1]

**Supplementary Table S1.** Genes and phenotype traits from the strains selected for adherence assays.

| Isolate | Genotype    |              |                  |                |             |            |             |              |            | Phenotype |         |            |
|---------|-------------|--------------|------------------|----------------|-------------|------------|-------------|--------------|------------|-----------|---------|------------|
|         | <i>fimH</i> | <i>fliCD</i> | <i>sfaD/focC</i> | <i>papG-II</i> | <i>kpsM</i> | <i>iha</i> | <i>papC</i> | <i>agn43</i> | Phylogroup | Biofilm   | Capsule | Morphotype |
| 1       | +           | +            | neg              | +              | +           | +          | neg         | neg          | B2         | neg       | +       | +          |
| 2       | +           | +            | +                | +              | +           | neg        | neg         | neg          | B1         | +         | neg     | +          |
| 3       | +           | +            | +                | +              | neg         | +          | neg         | +            | C          | +         | neg     | +          |
| 4       | +           | +            | +                | +              | neg         | +          | neg         | +            | C          | neg       | +       | +          |
| 5       | +           | +            | +                | +              | +           | neg        | neg         | neg          | C          | neg       | +       | +          |
| 6       | +           | +            | +                | +              | +           | +          | neg         | +            | B2         | neg       | +       | neg        |
| 7       | +           | neg          | neg              | neg            | neg         | neg        | neg         | +            | B1         | neg       | +       | neg        |
| 8       | +           | +            | +                | neg            | +           | neg        | neg         | neg          | ND         | neg       | neg     | +          |
| 9       | +           | +            | +                | +              | +           | neg        | +           | neg          | B2         | +         | +       | neg        |
| 10      | +           | +            | +                | +              | neg         | neg        | +           | neg          | ND         | neg       | neg     | neg        |
| 11      | +           | +            | +                | neg            | +           | neg        | neg         | +            | ND         | neg       | neg     | +          |
| 12      | +           | +            | +                | +              | +           | +          | +           | +            | E          | +         | +       | neg        |
| 13      | +           | +            | +                | +              | +           | neg        | neg         | +            | ND         | neg       | +       | +          |
| 14      | +           | neg          | neg              | neg            | +           | neg        | neg         | neg          | E          | neg       | +       | neg        |
| 15      | +           | +            | neg              | neg            | neg         | +          | neg         | +            | E          | +         | +       | +          |
| 16      | +           | +            | +                | neg            | +           | +          | neg         | +            | B1         | neg       | +       | +          |
| 17      | +           | +            | neg              | +              | neg         | +          | +           | neg          | ND         | +         | neg     | +          |
| 18      | +           | +            | +                | +              | neg         | neg        | +           | neg          | B2         | +         | +       | +          |
| 19      | +           | +            | neg              | +              | neg         | neg        | neg         | neg          | ND         | +         | neg     | +          |
| 20      | +           | +            | +                | +              | +           | neg        | neg         | neg          | ND         | neg       | +       | +          |

Symbols denotes a PCR positive reaction or a positive phenotype in each strain, “neg” denotes a negative reaction or a negative phenotype in each strain.
